# Supplementary material
Source: PubMed Central journal article supplement (PMC4284416)
Supplement: CJN.05630614_CJN05630614SupplementaryData.pdf [file CJN.05630614_CJN05630614SupplementaryData.pdf]

# **Pharmacokinetic Assessment in Patients Receiving Continuous Renal Replacement Therapy: Perspectives from the Kidney Health Initiative**

Thomas D. Nolin, PharmD, PhD,<sup>1</sup> George R. Aronoff, MD,<sup>2</sup> William H. Fissell, MD,<sup>3</sup> Lokesh Jain, PhD,<sup>4</sup> Rajnikanth Madabushi, PhD,<sup>4</sup> Kellie Reynolds, PharmD,<sup>4</sup> Lei Zhang, PhD,<sup>4</sup> Shiew Mei Huang, PhD,<sup>4</sup> Rajnish Mehrotra, MD,<sup>5</sup> Michael F. Flessner, MD, PhD,<sup>6</sup> John K. Leypoldt, PhD,<sup>7</sup> Jennifer W. Witcher, PhD,<sup>8</sup> Issam Zineh, PharmD,<sup>4</sup> Patrick Archdeacon, MD,<sup>9</sup> Prabir Roy-Chaudhury, MD, PhD,<sup>10</sup> and Stuart L. Goldstein, MD<sup>11</sup>

## Affiliations

<sup>1</sup> Department of Pharmacy and Therapeutics, Center for Clinical Pharmaceutical Sciences; Department of Medicine, Renal-Electrolyte Division; and Department of Critical Care Medicine, Center for Critical Care Nephrology, University of Pittsburgh Schools of Pharmacy and Medicine, Pittsburgh, PA

<sup>2</sup> Department of Medicine, Division of Nephrology & Hypertension, University of Louisville School of Medicine, Louisville, KY

<sup>3</sup> Department of Medicine, Division of Nephrology and Hypertension, Vanderbilt University School of Medicine, Nashville, TN

<sup>4</sup> Office of Clinical Pharmacology, Office of Translational Sciences, Center for Drug Evaluation and Research, U.S. Food and Drug Administration, Silver Spring, MD

<sup>5</sup> Kidney Research Institute, Department of Medicine, Division of Nephrology, University of Washington School of Medicine, Seattle, WA

<sup>6</sup> Inflammatory Renal Disease Program, National Institute of Diabetes and Digestive Kidney Diseases, National Institutes of Health, Bethesda, MD

<sup>7</sup> Medical Products (Renal), Baxter Healthcare Corporation, Deerfield, IL

<sup>8</sup> Eli Lilly and Company, Indianapolis, IN

<sup>9</sup> Office of Medical Policy, Center for Drug Evaluation and Research, U.S. Food and Drug Administration, White Oak, MD

<sup>10</sup> Department of Internal Medicine, Division of Nephrology & Hypertension, University of Cincinnati College of Medicine, Cincinnati, OH

<sup>11</sup> Department of Pediatrics, Center for Acute Care Nephrology, Cincinnati Children's Hospital Medical Center, University of Cincinnati College of Medicine, Cincinnati, OH
